# Supplementary material for: Mitigating the Spread and Translocation of Salmonella Enteritidis in Experimentally Infected Broilers under the Influence of Different Flooring Housing Systems and Feed Particle Sizes
Source: MDPI journal article supplement (doi:10.3390/microorganisms9040874), 2021-04-18
Supplement: s1 [file s1]

### Supplementary material S. 3

**Table 1.** Composition of broiler commercial diets during three the growing phases (g/kg as fed).

| Feedstuff                         | Dietary Phases (g/kg as fed) |        |          |
|-----------------------------------|------------------------------|--------|----------|
|                                   | Starter <sup>†</sup>         | Grower | Finisher |
| Wheat *                           | 436                          | 504    | 461      |
| Soybean meal (42% crude protein)  | 322                          | 268    | 251      |
| Corn                              | 145                          | 114    | 90.0     |
| Rapeseed meal (32% crude protein) | -                            | 19.0   | 27.0     |
| Triticale                         | -                            | -      | 90.0     |
| Plant oil (soybean)               | 39.0                         | 48.0   | 46.0     |
| Animal fat (pig)                  | 9.70                         | 9.50   | 9.00     |
| Calcium carbonate                 | 17.0                         | 15.0   | 10.0     |
| Monocalcium phosphate             | 12.0                         | 8.70   | 3.30     |
| Sodium bicarbonate                | 1.80                         | 1.90   | 1.90     |
| Sodium chloride                   | 1.80                         | 1.40   | 1.40     |
| Premix **                         | 15.7                         | 10.5   | 9.40     |

<sup>†</sup> The starter diet was identical for all groups and contained 3% whole wheat. \* Either coarse (5% or 10%) or fine ground for grower and finisher dietary phases. \*\* Composition (per kg) for starter diet: methionine hydroxy analogue 3.8 g; vitamin A 11640 IU, vitamin D3 4850 IU, vitamin E 58 mg, zinc 65 mg, iron 52.3 mg, manganese 106.6 mg, copper 14.5 mg, iodine 1.9 mg and selenium 0.29 mg; 6-phytase 485 FTU, 1,4-xylanase 1551 U, narasin 48.5 mg, nicarbacin 48.5 mg. \*\* Composition (per kg) for grower diet: methionine hydroxy analogue 3.3 g; vitamin A 9500 IU, vitamin D3 4750 IU, vitamin E 33 mg, zinc 47.5 mg, iron 19 mg, manganese 66.5 mg, copper 14.2 mg, iodine 1.9 mg and selenium 0.28 mg, 6-phytase 237 FTU, 1,4 -xylanase 1425 U, narasin 47.5 mg, nicarbacin 47.5 mg. \*\* Composition (per kg) for finisher diet: methionine hydroxy analogue 2.8 g; vitamin A 12000 IU, vitamin D3 5000 IU, vitamin E 35 mg, zinc 50 mg, iron 20 mg, manganese 70 mg, copper 15 mg, iodine 2 mg and selenium 0.28 mg, 6-phytase 225 FTU, 1,4-xylanase 1350 U, salinomycin-sodium 70 mg.
