# Supplementary material for: Mitigating the Spread and Translocation of Salmonella Enteritidis in Experimentally Infected Broilers under the Influence of Different Flooring Housing Systems and Feed Particle Sizes
Source: MDPI journal article supplement (doi:10.3390/microorganisms9040874), 2021-04-18
Supplement: s1 [file s1]

## Supplementary material S. 2

### *Salmonella* infection in the seeder birds three days post infection and at the end of experiment

**Table 1.** *Salmonella* Enteritidis-positive samples of cloacal swabs from the seeders in the first three days of life post infection depending on different flooring systems and dietary treatments

|                           | Finely ground diet            |                               |                                 |                               | Coarsely ground diet          |                               |                                 |                               |
|---------------------------|-------------------------------|-------------------------------|---------------------------------|-------------------------------|-------------------------------|-------------------------------|---------------------------------|-------------------------------|
|                           | L <sup>+</sup> H <sup>-</sup> | L <sup>+</sup> H <sup>+</sup> | L <sup>+/</sup> -H <sup>-</sup> | L <sup>-</sup> H <sup>-</sup> | L <sup>+</sup> H <sup>-</sup> | L <sup>+</sup> H <sup>+</sup> | L <sup>+/</sup> -H <sup>-</sup> | L <sup>-</sup> H <sup>-</sup> |
| Bird number               | 6                             | 6                             | 6                               | 6                             | 6                             | 6                             | 6                               | 6                             |
| Cloacal Swabs (Npos/Ntot) | 36/36                         | 36/36                         | 36/36                           | 36/36                         | 26/36                         | 26/36                         | 27/36                           | 30/36                         |
| Percent (%)               | 100                           | 100                           | 100                             | 100                           | 72.3                          | 72.3                          | 75                              | 83.3                          |

Npos = number of *Salmonella*-positive swab samples; Ntot = total number of swab samples

L<sup>+</sup>H<sup>-</sup>: entire floor pen covered with litter; L<sup>+</sup>H<sup>+</sup>: floor pen covered with litter and floor heating; L<sup>+/</sup>-H<sup>-</sup>: partially slatted flooring; L<sup>-</sup>H<sup>-</sup>: fully slatted flooring with sand bath.

**Table 2.** *Salmonella* Enteritidis-positive samples of the caecal contents and the liver from the seeders on the day 37 depending on different flooring systems and dietary treatments

|                                        | Finely ground diet            |                               |                                 |                               | Coarsely ground diet          |                                            |                                 |                                            |
|----------------------------------------|-------------------------------|-------------------------------|---------------------------------|-------------------------------|-------------------------------|--------------------------------------------|---------------------------------|--------------------------------------------|
|                                        | L <sup>+</sup> H <sup>-</sup> | L <sup>+</sup> H <sup>+</sup> | L <sup>+/</sup> -H <sup>-</sup> | L <sup>-</sup> H <sup>-</sup> | L <sup>+</sup> H <sup>-</sup> | L <sup>+</sup> H <sup>+</sup> <sup>1</sup> | L <sup>+/</sup> -H <sup>-</sup> | L <sup>-</sup> H <sup>-</sup> <sup>2</sup> |
| <b>Caecal contents</b>                 |                               |                               |                                 |                               |                               |                                            |                                 |                                            |
| Qualitative (Npos/Ntot)                | 5/6                           | 6/6                           | 6/6                             | 6/6                           | 2/6                           | 1/4                                        | 4/6                             | 3/5                                        |
| Percent (%)                            | 83.3                          | 100.                          | 100                             | 100                           | 33.3                          | 25.0                                       | 66.7                            | 60.0                                       |
| Quantitative (log <sub>10</sub> CFU/g) | 4.04                          | 5.15                          | 4.19                            | 6.18                          | 0.00                          | 4.88                                       | 4.34                            | 0.00                                       |
| <b>Liver</b>                           |                               |                               |                                 |                               |                               |                                            |                                 |                                            |
| Qualitative (Npos/Ntot)                | 4/6                           | 4/6                           | 4/6                             | 4/6                           | 3/6                           | 4/4                                        | 6/6                             | 4/5                                        |
| Percent (%)                            | 66.7                          | 66.7                          | 66.7                            | 66.7                          | 50.0                          | 100                                        | 100                             | 80.0                                       |

Npos = number of *Salmonella*-positive swab samples; Ntot = total number of swab samples

L<sup>+</sup>H<sup>-</sup>: entire floor pen covered with litter; L<sup>+</sup>H<sup>+</sup>: floor pen covered with litter and floor heating; L<sup>+/</sup>-H<sup>-</sup>: partially slatted flooring; L<sup>-</sup>H<sup>-</sup>: fully slatted flooring with sand bath.

<sup>1</sup> Two seeders died at d 32.

<sup>2</sup> One seeder died at d 32.
